# Supplementary material
Source: PubMed Central journal article supplement (PMC8245143)
Supplement: zuaa021_supplementary_data.pdf [file zuaa021_supplementary_data.pdf]

**SUPPLEMENTAL FIGURES AND TABLES**

**Mortality risk stratification using artificial intelligence-augmented electrocardiogram in cardiac intensive care unit patients**

Jacob C. Jentzer, MD<sup>1,2</sup>; Anthony H. Kashou, MD<sup>3</sup>; Francisco Lopez-Jimenez, MD MBA<sup>1</sup>;  
Zachi I. Attia, MSc<sup>1</sup>; Suraj Kapa, MD<sup>1</sup>; Paul A. Friedman, MD<sup>1</sup>; Peter A. Noseworthy, MD<sup>1,4</sup>

<sup>1</sup> Department of Cardiovascular Medicine, Mayo Clinic, Rochester, Minnesota

<sup>2</sup> Division of Pulmonary and Critical Care Medicine, Department of Internal Medicine, Mayo Clinic, Rochester, Minnesota

<sup>3</sup> Department of Internal Medicine, Mayo Clinic, Rochester, Minnesota

<sup>4</sup> Robert D. and Patricia E. Kern Center for the Science of Health Care Delivery, Mayo Clinic, Rochester, Minnesota

**Page 2: Supplemental Figure 1**

**Page 3: Supplemental Figure 2**

**Page 4: Supplemental Figure 3A**

**Page 5: Supplemental Figure 3B**

**Page 6: Supplemental Figure 4**

**Page 7: Supplemental Table 1**

# Jentzer, et al. AI-ECG and Mortality in CICU

**Supplemental Figure 1:** Flow diagram demonstrating inclusion and exclusion criteria for the final study population.

*Abbreviations: AI-ECG, artificial intelligence-augmented electrocardiogram; CICU, cardiac intensive care unit; ECG, electrocardiogram; LVEF, left ventricular ejection fraction; TTE, transthoracic echocardiogram.*

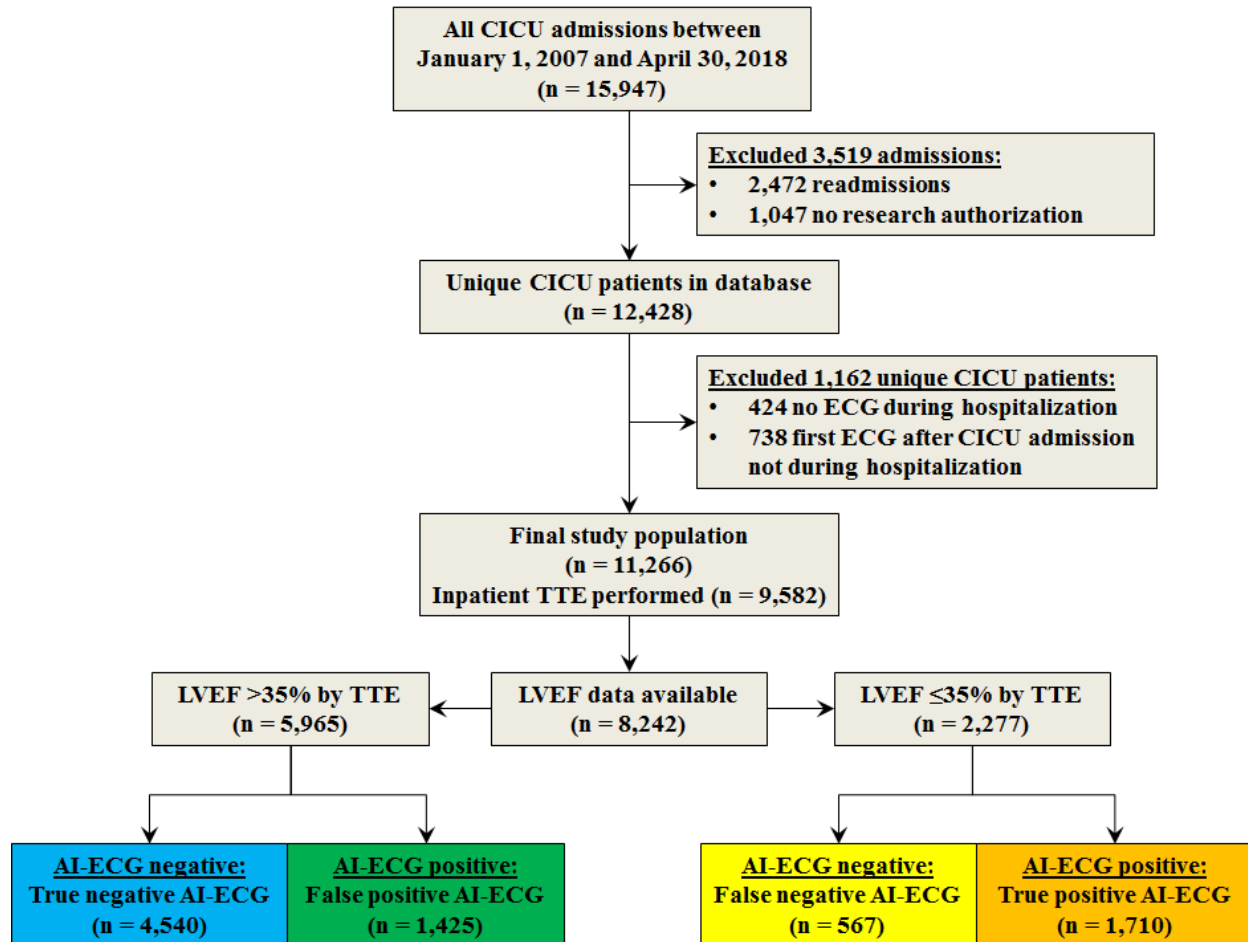

## Jentzer, et al. AI-ECG and Mortality in CICU

**Supplemental Figure 2:** CICU and hospital mortality as a function the AI-ECG probability of LVSD quintile. P <0.001 for trends across categories.

*Abbreviations: AI-ECG, artificial intelligence-augmented electrocardiogram; CICU, cardiac intensive care unit; ECG, electrocardiogram; LVSD, left ventricular systolic dysfunction.*

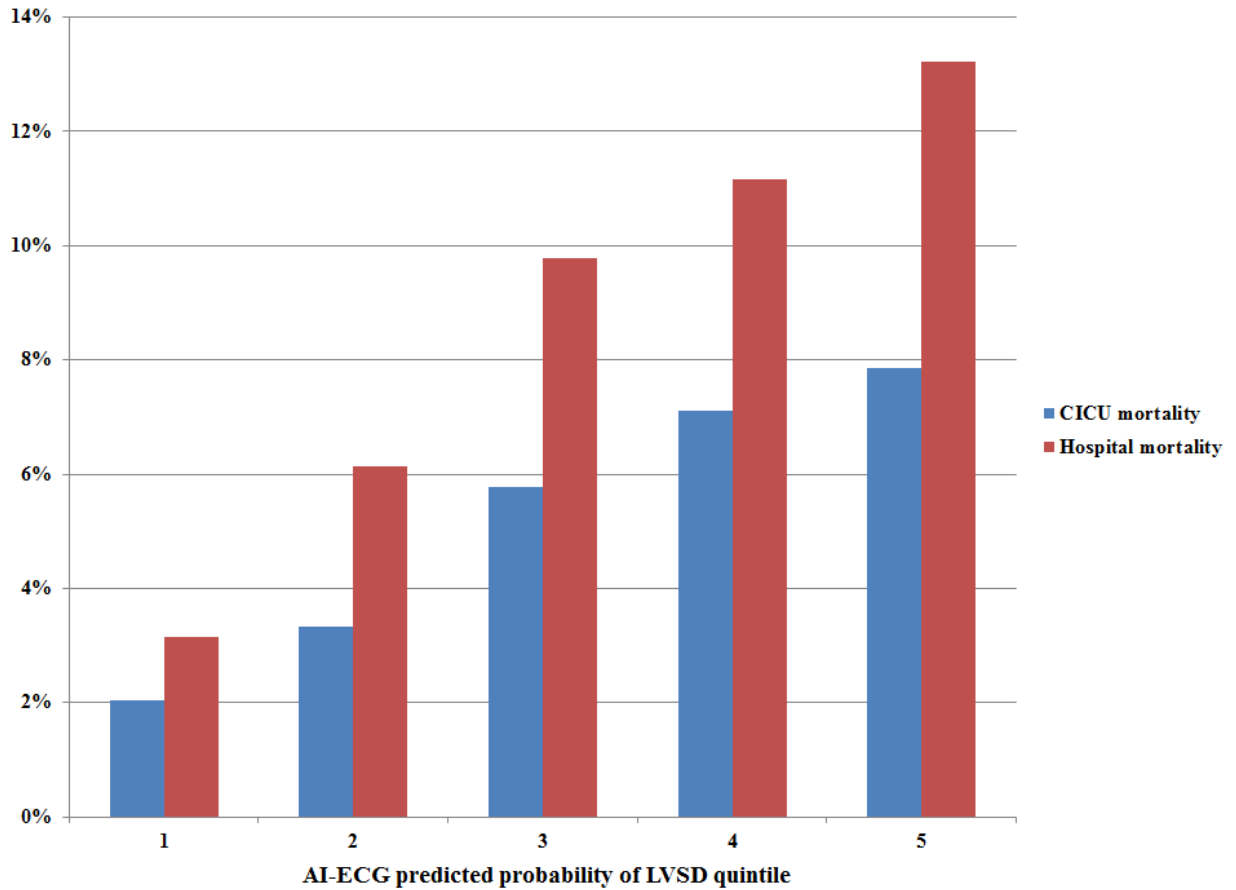

**Jentzer, et al. AI-ECG and Mortality in CICU**

**Supplemental Figure 3A:** Kaplan-Meier one-year survival curves for AI-ECG probability of LVSD quintiles. P <0.001 by log-rank.

*Abbreviations: AI-ECG, artificial intelligence-augmented electrocardiogram; LVSD, left ventricular systolic dysfunction.*

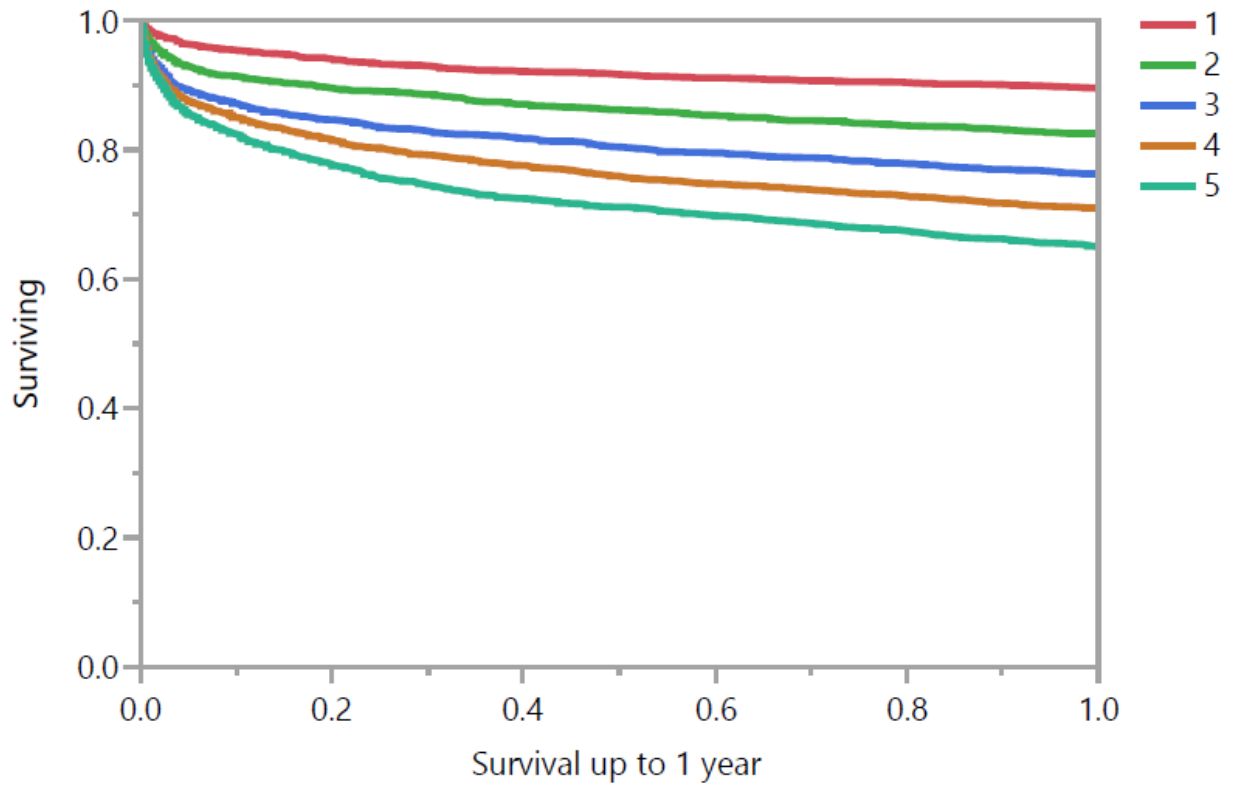

**Jentzer, et al. AI-ECG and Mortality in CICU**

**Supplemental Figure 3B:** Kaplan-Meier one-year survival curves based on the presence and severity of LVSD on TTE using current ASE guidelines.  $P < 0.001$  by log-rank.

*Abbreviations: ASE, American Society for Echocardiography; LVSD, left ventricular systolic dysfunction; TTE, transthoracic echocardiogram.*

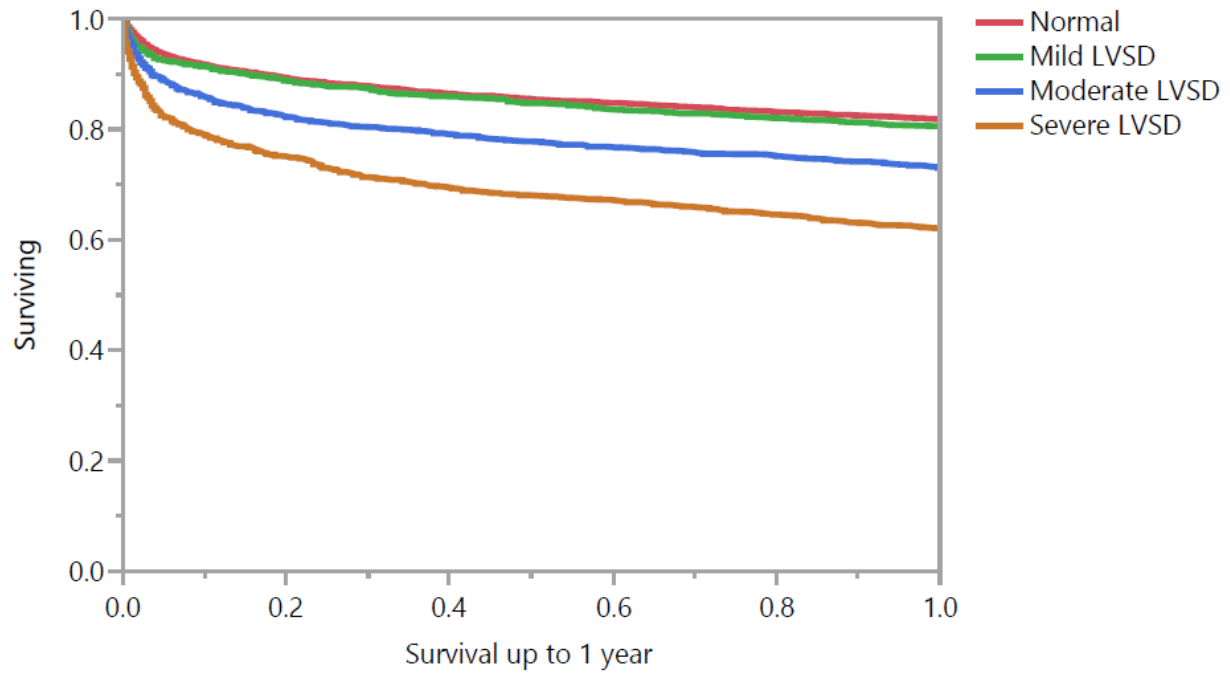

**Jentzer, et al. AI-ECG and Mortality in CICU**

**Supplemental Figure 4:** Heat map demonstrating one-year survival as a function of LVSD on TTE based on current ASE guidelines (Y axis) and AI-ECG probability of LVSD quintile (X axis). Darker colors represent a higher risk of one-year death.

*Abbreviations: AI-ECG, artificial intelligence-augmented electrocardiogram; ASE, American Society for Echocardiography; LVSD, left ventricular systolic dysfunction; TTE, transthoracic echocardiogram.*

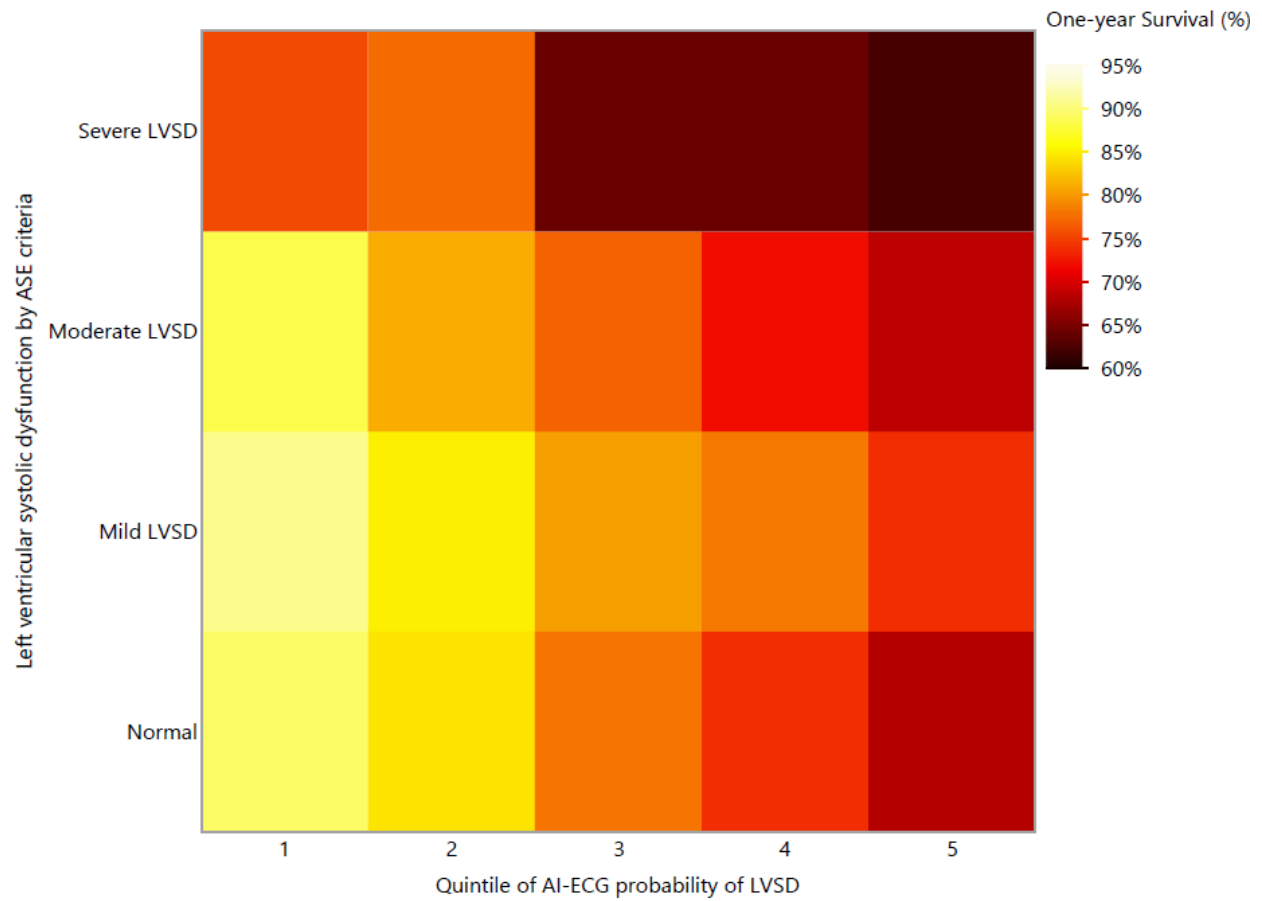

**Jentzer, et al. AI-ECG and Mortality in CICU**

**Supplemental Table 1:** Predictors of adjusted hospital mortality on multivariable logistic regression among patients with an inpatient TTE. Data are displayed as adjusted unit odds ratio, 95% confidence interval and p value. The final model AUC was 0.902 for discrimination of hospital mortality.

| <b>Variable</b>                             | <b>Adjusted odds ratio</b> | <b>95% confidence interval</b> | <b>P value</b> |
|---------------------------------------------|----------------------------|--------------------------------|----------------|
| <i>Demographics</i>                         |                            |                                |                |
| Age (per 1 year older)                      | 1.018                      | 1.010-1.026                    | <0.0001        |
| Female Sex                                  | 1.198                      | 0.981-1.463                    | 0.0759         |
| White race                                  | 0.666                      | 0.478-0.928                    | 0.0164         |
| Charlson Comorbidity Index (per 1 point)    | 1.041                      | 1.004-1.079                    | 0.0310         |
| Prior dialysis                              | 0.896                      | 0.625-1.284                    | 0.5494         |
| <i>Admission diagnoses</i>                  |                            |                                |                |
| Cardiac arrest                              | 2.396                      | 1.867-3.076                    | <0.0001        |
| Shock                                       | 2.009                      | 1.573-2.567                    | <0.0001        |
| Sepsis                                      | 1.466                      | 1.125-1.910                    | 0.0047         |
| Respiratory failure                         | 1.833                      | 1.425-2.360                    | <0.0001        |
| Acute coronary syndrome                     | 0.997                      | 0.793-1.253                    | 0.9789         |
| Heart failure                               | 0.835                      | 0.656-1.063                    | 0.1439         |
| <i>Severity of illness</i>                  |                            |                                |                |
| APACHE-III score (per 1 point)              | 1.017                      | 1.012-1.021                    | <0.0001        |
| Braden skin score (per 1 point)             | 0.875                      | 0.845-0.906                    | <0.0001        |
| <i>Procedures and therapies</i>             |                            |                                |                |
| Invasive ventilator                         | 0.554                      | 0.410-0.748                    | 0.0001         |
| Noninvasive ventilator                      | 1.050                      | 0.835-1.320                    | 0.6770         |
| Number of vasoactive drugs (per each)       | 1.378                      | 1.257-1.512                    | <0.0001        |
| Dialysis                                    | 3.016                      | 1.990-4.571                    | <0.0001        |
| CRRT                                        | 1.350                      | 0.804-2.267                    | 0.2563         |
| Coronary angiography                        | 0.540                      | 0.431-0.677                    | <0.0001        |
| PCI                                         | 0.763                      | 0.590-0.985                    | 0.0381         |
| IABP                                        | 0.939                      | 0.702-1.255                    | 0.6684         |
| PAC                                         | 0.810                      | 0.608-1.080                    | 0.1507         |
| RBC transfusion                             | 0.830                      | 0.647-1.065                    | 0.1424         |
| CPR (in-hospital cardiac arrest)            | 3.265                      | 2.210-4.824                    | <0.0001        |
| <i>Assessment of cardiac function</i>       |                            |                                |                |
| LVEF by TTE (per each 5% higher)            | 0.958                      | 0.926-0.992                    | 0.0151         |
| AI-ECG probability of LVSD (per 0.1 higher) | 1.048                      | 1.016-1.080                    | 0.0027         |
